# Supplementary material for: Putative candidate genes responsible for leaf rolling in rye (Secale cereale L.)
Source: BMC Genet. 2018 Aug 9;19:57. doi: 10.1186/s12863-018-0665-0 (PMC6085706; doi:10.1186/s12863-018-0665-0)
Supplement: Supplementary file 1 — Matrix of coefficient correlation of leaf rolling (RL) in nine experimental variants, assessed in rye mapping population RIL-M. (XLSX 11 kb) [file 12863_2018_665_MOESM1_ESM.xlsx]

## Sheet: legend
Putative candidate genes responsible for leaf rolling in rye (Secale cereale L.)
Beata Myśków1*, Magdalena Góralska1, Natalia Lenarczyk1, Ilona Czyczyło-Mysza2, Stefan Stojałowski1
1 West-Pomeranian University of Technology, Szczecin; Department of Plant Genetics, Breeding and Biotechnology; ul. Słowackiego 17; 71-434 Szczecin; Poland
2 The Franciszek Górski Institute of Plant Physiology; Polish Academy of Science; Cracow; ul. Niezapominajek 21; 30-239 Cracow; Poland
Matrix of coefficient correlation of leaf rolling (RL) in nine experimental variants, assessed in rye mapping population RIL-M.
bolded - significant at P=0.01

## Sheet: data
RL2008-1	RL2008-2	RL2009-1	RL2009-2	RL2010-1	RL2010-2	RL2012	RL2013	RL2017
1	0.597718	0.392834	0.194928	0.443865	0.358089	0.54449	0.458928	0.52829	RL2008-1
	1	0.469639	0.402658	0.597878	0.247196	0.550763	0.395146	0.596371	RL2008-2
		1	0.351863	0.474299	0.287484	0.380024	0.304462	0.404189	RL2009-1
			1	0.259997	0.298869	0.401188	0.365129	0.287552	RL2009-2
				1	0.482699	0.467778	0.446919	0.484382	RL2010-1
					1	0.394588	0.28626	0.292428	RL2010-2
						1	0.44448	0.563779	RL2012
							1	0.444501	RL2013
								1	RL2017
